# Supplementary material
Source: publisher figshare collection journal article supplement (https://karger.figshare.com/ndownloader/files/33158318)
Supplement: Supplementary file 1 [file 33158318]

**Erhebung des Stagingverhaltens in zertifizierten und nicht zertifizierten Brustzentren**

Unsere Institution verfügt über:

ein **zertifiziertes Brustzentrum** ein **nicht zertifiziertes Brustzentrum**

**kein Brustzentrum**, aber hin und wieder werden in unserer gynäkologischen Abteilung Mammakarzinom-

Patientinnen behandelt

Zu welchem Zeitpunkt führen Sie die Staginguntersuchung durch?

generell **präoperativ**

bei Verdacht auf Nodalbefall **präoperativ**

**präoperativ** bei aggressiver Tumorbiologie (z.B. HER2/neu positiv oder tripple-negativ)

**präoperatives** Staging in Abhängigkeit von der Größe des Primärtumors

🡪 Wenn ja, ab welchem T-Stadium?............................................................................

generell **postoperativ**

bei pathologisch bestätigtem Nodalbefall **postoperativ**

**postoperativ** bei aggressiver Tumorbiologie (z.B. HER2/neu positiv oder tripple-negativ)

**postoperatives** Staging in Abhängigkeit von der Größe des Primärtumors

🡪 Wenn ja, ab welchem T-Stadium?............................................................................

Welche Untersuchungen führen Sie im Rahmen des Stagings durch?

| Computertomographie Thorax, Abdomen Ja Nein |
| --- |
| Bemerkung: ................................................. |
| Skelettszintigraphie Ja Nein |
| Bemerkung: .................................................. |
| Abdomensonographie Ja Nein |
| Bemerkung: .................................................. |
| Röntgen-Thorax Ja Nein |
| Bemerkung: ................................................. |
| Tumormarker Ja Nein |
| Bemerkung: ................................................. |
| MRT Ja Nein |
| Bemerkung: ................................................. |
| PET/PET-CT Ja Nein |
| Bemerkung: ................................................. |

Weitere Bemerkungen: .............................................................................................................................................

...................................................................................................................................................................................

...................................................................................................................................................................................

...................................................................................................................................................................................

...................................................................................................................................................................................

...................................................................................................................................................................................

...................................................................................................................................................................................

...................................................................................................................................................................................

...................................................................................................................................................................................

...................................................................................................................................................................................

...................................................................................................................................................................................

...................................................................................................................................................................................

...................................................................................................................................................................................
